# Supplementary material for: 2D MXene interfaces preserve the basal electrophysiology of targeted neural circuits
Source: Royal Society of Chemistry journal article supplement (doi:10.1039/d2nr01542k), 2022-01-01
Supplement: d2nr01542k3.pdf [file d2nr01542k3.pdf]

Supporting Information

## **2D MXene interfaces preserve the basal electrophysiology of targeted neural circuits**

*Miao Xiao*<sup>1, 3, 6, 7, #</sup>, *Xiaoyun Li*<sup>1, 3, #</sup>, *Simone Pifferi*<sup>3</sup>, *Beatrice Pastore*<sup>3</sup>, *Yun Liu*<sup>4</sup>, *Marco Lazzarino*<sup>8</sup>, *Vincent Torre*<sup>3, \*</sup>, *Xiaowei Yang*<sup>5, \*</sup>, *Anna Menini*<sup>3, \*</sup>, *Mingliang Tang*<sup>1, 2, \*</sup>

<sup>1</sup>Institute for Cardiovascular Science & Department of Cardiovascular Surgery of the First Affiliated Hospital, Medical College, Soochow University, Suzhou, 215000, China.

<sup>2</sup>Co-innovation Center of Neuroregeneration, Nantong University, Nantong 226001, China

<sup>3</sup>Neurobiology Sector, International School for Advanced Studies (SISSA), via Bonomea 265, Trieste 34136, Italy.

<sup>4</sup>Key Laboratory for Developmental Genes and Human Disease, Ministry of Education, Institute of Life Sciences, Southeast University, Nanjing 210096, China

<sup>5</sup>School of Chemistry and Chemical Engineering, Frontiers Science Center for Transformative Molecules, Shanghai Jiao Tong University, Shanghai, China

<sup>6</sup>Suzhou Fishseeds Bio-technology, LTD, Suzhou 215138, China

<sup>7</sup>Anhui Isotex Biotech Co. Xuancheng 242300, China

<sup>8</sup>IOM-CNR, Area Science Park, Basovizza, Trieste 34149, Italy.

<sup>#</sup>These authors contributed equally to this work.

Email: torre@sissa.it, yangxw@sjtu.edu.cn, menini@sissa.it, mltang@suda.edu.cn

## Supplementary Videos

**Supplementary Video\_Coverslip\_001.** Representative Fluo-4 AM fluorescence calcium imaging of 9 hippocampal neuron cultures on coverslip for 8 days *in vitro*.

**Supplementary Video\_MXene\_001.** Representative Fluo-4 AM fluorescence calcium imaging of 9 hippocampal neuron cultures on uncoated  $Ti_3C_2T_x$  MXene film for 8 days *in vitro*.

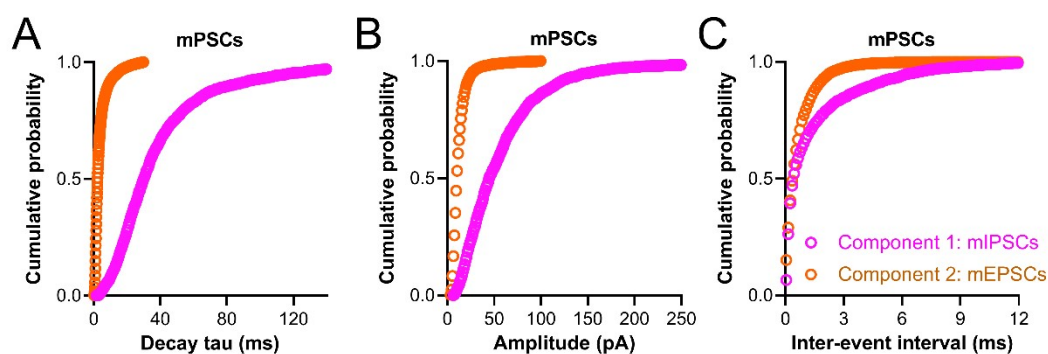

**Supplementary Figure 1.** Two types of events from mPSCs which was recorded from a voltage-clamped hippocampal neuron (at holding potential of -50 mV) grown on the poly-L-ornithine coated coverslip control were identified. A slow decay component and a fast decay component were extracted from the mPSCs. These components differ in decay time (A, KS = 0.15, P = 0.001, Kolmogorov Smirnov test), amplitude (B, KS = 0.18, P = 0.009, Kolmogorov Smirnov test), and inter-event interval (C, KS = 0.55, P = 0.000). Slow (component 1) and fast (component 2) components, respectively referred to mIPSCs and mEPSCs.

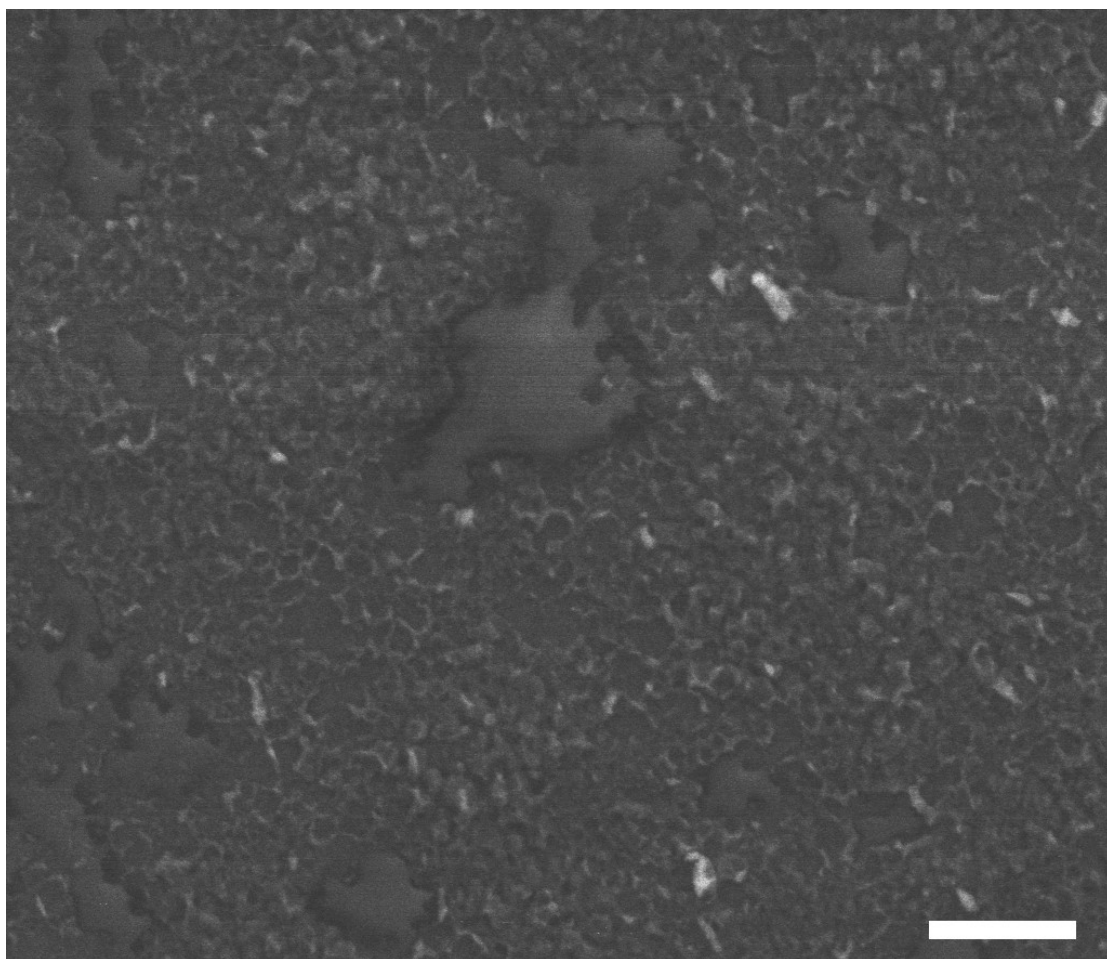

**Supplementary Figure 2.** Representative SEM image of the Ti<sub>3</sub>C<sub>2</sub>T<sub>x</sub> MXene film with enlarged higher-magnification. Scale bar = 5  $\mu$ m.
